# Supplementary material
Source: publisher figshare collection journal article supplement (https://brill.figshare.com/ndownloader/files/7533247)
Supplement: Supplementary file 1 [file 7533247]

## Sheet: Sheet1
sentence
(S)Ex. mi a jit am; mi a fruku [too].	#1
(S)Ex. di kabai, mi a ri am.	#2	not used
(S)Ex. mi a faŋ am ʌbɛni di {trap}.	#4
(S)Ex. mi kli mɛluk; mi a jet ši fɛlis.	#3
(S)Ex. spoidʌ ha muči futu.	#5
(S)Ex. wɛnɛ mɛ hal senu fo ʌbene sen {hole}, mi te dʌ sten o di stʌk an mi sla am, sla am, sla am, te an dot.	#6
(S)Ex. dɛ bi ma hʌni.	#7
(S)Ex. wʌrum	#8
(S)Ex. mi bin di tau a di sal.	#9
(S)Ex. mi a lo wɛruk {wi} di noli.	#10
(S)Ex. mi no jet senu atal.	#11
(S)Ex. fuluk kop senu an sen ha senu a se hus ʌbɛne en fɛrki pɛn.	#12
(S)Ex. ju lik senu?	#13
(S)Ex. lo a di graspis. ju sa fɛn sɛnu da.	#14
(S)Ex. lo ʌndo en bom, dɛ regun ko.	#15
(S)Ex. sen na skreju, {so} ju no wit ape sen {be}.	#16
(S)Ex. sen ko abo dʌ sten, an wɛnʌ ju lo a di se, ju pɛk sɛnu fam bo di stin	#17
(S)Ex. (S)Ex. dʌ koklus?	#18
(S)Ex. alma bɛnɛ di hus, hʌndu stɛn, bɛnɛ di bus, bo bom, alma ʌbit .	#19
(S)Ex. di maŋke di grʌn skin	#20
(S)Ex.{They} a maŋke di lan fʌ plan gras.	#21
(S)Ex. astu an šini di abit, an te di nal mi di garun, an a du di maŋke	#22
(S)Ex. am a wis en wɛt frau.	#23
(S)Ex. ju a ne en, ne {up} di andu wa bin {there} a gron.	#24
(S)Ex. sen klen klɛnči, klɛnči skɛn.	#25
(S)Ex. le di lamp.	#26
(S)Ex. ju ha mil?	#27
(S)Ex. mi maŋke dri pʌn; hoso ju frukʌ di?	#28
(S)Ex. wa mi maŋke fi kop?	#29
(S)Ex. sen lo fwuko fanja dri sɛn en [a pound].	#30
(S)Ex. en botl	#31
(S)Ex. wɛnɛ mi a wes klenči	#32
(S)Ex. mi grotma	#33
(S)Ex. astu mi a guri dan mi a ki di.	#34
(S)Ex. dɛn mi a ko {here St. Thomas} a mi mui.	#35
(S)Ex. {you know} wa ju moi? {you aunt}.	#36
(S)Ex. sen ha kaitirɛn nu ka tut.	#37
(S)Ex. sen ka du di.	#38
(S)Ex. sen lo bran di en dak. sen lo bran di en dag. di mi frʌt.	#39
(S)Ex. {we} pʌŋ dʌ laris an {we} dans	#40
(S)Ex. ju goi sopi abo di.	#41
(S)Ex. no frukɛ di.	#42
(S)Ex. mi driŋ di.	#43
(S)Ex. {not} danki, daŋki	#44
(S)Ex. lo frai; got segun ju.	#45
(S)Ex. lʌmunči	#46
(S)Ex. ju du ɛn stɛk [lard] abɛni di.	#47
(S)Ex. ju šini di {with} ju nif.	#48
(S)Ex. di sɛluf gut.	#49
(S)Ex. dɛn ju ma senu maŋkadu [together] dɛn ju [kneed] senu.	#50
(S)Ex. nʌ du di ʌbɛni na ovʌn, di pʌt, mi fi	#51
(S)Ex. ma ju mil mi ju fanja maŋkandu	#52
(S)Ex. ju bi baŋ.	#53
(S)Ex. ju mi moi: {that's good looking, you pretty}.	#54
(S)Ex. ju mi revin o ju mi- ju mi glʌs.	#66
(S)Ex. ju lo strik fanda? You gon iron today.	#56
(S)Ex. dɛn mi a riŋ senu an mi haŋ senu abiti.	#57
(S)Ex. wɛnɛ sen drok, mi ne {dem}.	#58
(S)ex. se mi wi a du di. {tell me who di it.}	#59
(S)Ex. {bowl} is kominči.	#60
(S)Ex. ju fɛruk [is you fork].	#61
(S)Ex. ma gau ko.	#62
(S)Ex. tundu.	#63
(S)Ex. sen sɛt ʌbɛni dʌ manskin ɛn sen spɛl.	#64
(S)Ex. andu fʌluk ko.	#65
(S)Ex. mi dra di noli abɛne di pat.	#67
(S)Ex. ju matʌ di fɛrgi.	#69
(S)Ex. sen du saut abɛnɛ di fles.	#68
(S)Ex. ju du di filis ʌbɛnɛ dʌ pan ɛn ju [put it].	#70
(S)Ex. ju ne saut... pEpu, pepu [that's pepper]	#71
(S)Ex. bre hopʌ di eju.	#72
(S)Ex. mi mi kwat.	#73
(S)Ex. pʌk am mi ju stuk.	#74
(S)Ex. stan stɛl.	#75
(S)Ex. ju fiŋgu senu.	#76
(S)Ex. teči.	#77
(S)Ex. an ju skim di oli du di abɛne en gut . . . ɛn ju kautu ɛn ju du di ʌbeni di batl.	#78
(S)Ex. {your} tʌŋ.	#79
(S)Ex. a ju maŋki.	#80
ju lo ale. [you go alone]	#81
(S)Ex. mi lo lo a kɛruk	#82
(S)Ex. dra di bakuba a ju meme.	#83
(S)Ex. antu antut mi.	#84
(S)ex. wi lo rup mi?	#85
(S)Ex. di dɛbil	#86
(S)Ex. di ha atufe fulʌk.	#87
(S)Ex. sen lo grav am. They gon bury him.	#88
(S)Ex. di mɛnši a ha en guŋgu bik.	#89
(S)Ex. an a wandu a lo a en hus en andu hus ape ši šiši a ka trou.	#90
(S)Ex. wa da be?	#92
(S)Ex. makutu	#93
(S)Ex. alma kin fiši, fɛs.	#94
(S)Ex. mi ka lʌs, lʌs senu.	#95
(S)Ex. an hɛl^	#96
(S)Ex. ju nem di.	#97
(S)Ex. dan ju drai di, ju drai di, ju drai di, en ju drai di.	#98
(S)Ex. flɛs.	#99
(S)Ex. stam di	#100
(S)Ex. an no a ha ɛnten stibu. am a wes poʌ.	#101
(S)Ex. sɛs, sɛwun, ak, negun, tin, alʌf, twalʌf	#102
(S)Ex. ons a lo ʌn a rupo skʌndu skʌndu fɛs	#103
(S)Ex. mi a ha en menši, {... }mi frEn, di regun mi di wɛn a ste ši duku fam bo ši lif, liste am nakun, nakun, nakun, nakun.	#104
(S)Ex. Ex. di win a bigin blas.	#105
(S)Ex. mi maŋke di hili fan senu.	#106
(S)Ex. mi maŋke di hilɛ fan senu. I want the whole of them.	#107
(S)Ex. dʌ haluf.	#108
(S)Ex. midl fan senu	#120a
(S)Ex. aši, side, aši dʌ hus.	#119
(S)Ex. amolɛ.	#109
(S)Ex. . . . laikʌ ju buči, lik ju buči .	#110
(S)Ex. ju rit han.	#111
(S)Ex an no ha enten duku fʌ dra.	#112	not used
(S)Ex. andu wik. {next week}.	#113
(S)Ex. di pʌpai: mi maŋke kuk di; mi maŋke jɛ di.	#114
(S)Ex. ko skrau di fɛs. {come scrape the fish.}	#115
(S)Ex. di nʌm a ka sla di frau lɛlʌk.	#116
S(Ex.) an ha fʌ lo a tapus a di haspitl.	#117
(S)Ex. ɛkɛ frufru, mi ne di kabrita sinu fʌ jit abɛni {the grass piece}.	#118
(S)Ex. an ka ko grot o an ka guŋgu.	#120
(S)Ex. ju gi di hʌn di bin	#121
(S)Ex. sen mi baŋ mi kap senu mi di sten.	#123
(S)Ex. Flik, ju lo flik.	#124
(S)Ex. sautu	#125
(S)Ex. ju ha a ju kop.	#126
(S)Ex. Ju lo lak astu mi.	#127
(S)Ex. an a lai ʌɛbnɛ di boba. an wɛl di boba.	#128
(S)Ex. ju noit fʌ fikɛte.	#129
(S)Ex. mi am fikiti am; mi a du ʌbɛni brambi nɛs.	#131
(S)Ex. am a gɛra.	#130
(S)Ex. ons gera.	#132
(S)Ex. {heavy} mi swa.	#133
(S)Ex. lʌs	#134
(S)Ex. fɛrgi lus	#135
(S)Ex. {plenty} ju se ha muši.	#136
(S)Ex. ju nas	#137
(S)Ex.ju se ju maŋke stɛki fɛrgi mun.	#138
(S)Ex. briŋ di sɛp fʌ mi.	#139	not used
(S)Ex.kuk. mi a skon di hus. mi	#140
(S)Ex. tɛte	#141
(S)Ex. lo sik di tabl.	#142
(S)Ex. wa mi lo kok, kaka?	#143
(S)Ex. [di fork is] foruk	#144
(S)Ex. an a lo andu wɛk disinda.	#145
(S)Ex. ɛn mi a sɛt a waitʌ senu; waitʌ senu te sen a kaba.	#146
(S)Ex. mi maŋke en nɛf. {it must be sharp} fo sni di pampun.	#147
(S)Ex. an a gibo a sani cruz.	#148
(S)Ex. an a du so ʌnte an no a wit wa fo se weran.	#149
(S)Ex. mi a wɛs lɛluk.	#150
(S)Ex. wɛn {they} ha sti mi, mi a lo a bus, lo sɛt.	#151
(S)Ex. ju hut	#152
(S)Ex. mi lo abit fandʌ duŋku.	#153
(S)Ex. en, twe, dri, fi, fɛiv, sɛs, sivun, akt, negun, tin, alif, twalif	#154
(S)Ex. ki hoso sen kuri.	#155
(S)Ex. ki huso sen kuri.	#156
(S)Ex. wɛnɛ hun ha bin lo spil, puši maŋke di.	#157
(S)Ex. mi a wɛl ɛm muči.	#158
(S)Ex. lista mi paso a ju blif. Let me pass if you please.	#159
(S)Ex. mi a ha en nju kapʌto.	#160
(S)Ex.dan mi a du di kapoto abo mi lif.	#161
(S)Ex. mi skrɛju, mi a skrɛju; se a mi maŋke lo a skul.	#162
(S)Ex. a was di mi prʌkupɛʌ.	#163
(S)Ex. am a se sen ha bruka; sen ha bruka.	#164
(S)Ex. abɛnɛ is in ju face --gosɛ.	#165
(S)Ex. en frau a ko frak am a ha enten apl fo fruko.	#166
(S)Ex. froko? {That's sell.}	#167
(S)Ex. mi a se am adjos.	#168
(S)Ex. mi a se am alma rɛt.	#169
(S)Ex. mi a stan afo ʌm.	#170
(S)Ex. mi a rapo di.	#171
(S)Ex. mi a ne en guŋgu en, lɛkʌ ju sak dɛ	#172
(S)Ex. sik ko ʌbo kabai rɛge; bli en tit fo lo.	#174
(s)Ex. ko krau mi rigi.	#173
(S)Ex. wɛn hariken a ko ʌbo di frau, an ha fo ne ši duku.	#175
(S)Ex. hoso di glaz a bre?	#176
(S)Ex. di kin a goi di abo di grʌn, a di flo, abeni di hus.	#177
(S)Ex. ju no lo fin ɛnten kuklus agintu da.	#179
(S)Ex. mi mi mu.	#178
(S)Ex. mi a fin am ʌbɛnʌ mi man ši hus.	#180
(S)Ex. mi no lo lo enten plɛ.	#181
(S)Ex. sen no ka guri nuŋgal.	#182
(S)Ex. ju jet sizaka?	#183
(S)Ex. lista mi pasɛ klen bičI.	#184
(S)Ex. ne di puši stɛt.	#185
(S)Ex. ju ho? lo a di dʌktu mi di.	#186
(S)Ex. mi ha en gunŋu bɛrɛ ɛn dɛn {we} ha ɛn klɛnči.	#187
(S)Ex. skrif en {book}.	#188
(S)Ex. am a maŋke fʌ titi di kin.	#189
(S)Ex. an a wɛ, a fra mi: apɛ mi a wun.	#190
(S)Ex. mi a ka ki am en mant.	#191
(S)Ex. sen a wes hi, satida. satidak?	#192
(S)Ex. wa ti di be?	#193
(S)Ex. mi lo sal di mjul fo lo a taphus	#194
(S)Ex. an lo skop mi.	#195
skʌp	#196
in, twe, dri.	#197
(S)Ex. mi a se, mi bin dɛr abɛnɛ mi bɛri, {now}.	#198
(S)Ex. wɛnɛ mi hopo mi hogo, sen a ko abɛnɛ fo kam mi {hair}.	#199
(S)Ex. mi a hopo a sɛwun, sevʌn nu frufru.	#200
(S)Ex. mi no wɛl pipu.	#201
(S)Ex. ju noit ko kik am.	#202
(S)Ex. mi lo gi ju fʌv patʌkon nu.	#203
(S)Ex. ki di kabrita mi di hou bɛn han.	#204
(S)Ex. di frʌu a ha muči kin.	#205
(S)Ex. paso hoso ju spil; ju lo te ju kapʌto.	#206
(S)Ex. mi wɛl bonči sʌp mi {pidgin peas}, bonči.	#207
(S)Ex. . . . fɛs mi {okro}, ɛn mi kjambo.	#208
(S)Ex. ɛn mi lo pɛk hautu.	#209
(S)Ex. ju kuk ju fɛs mi ju fungi, mi ju kjambo.	#210
(S)Ex. wɛnɛ ju pik senu fam bo di bom, ju was senu.	#211
S)Ex. ašiši	#212
(S)Ex. wɛnɛ di fi a hit, ju a nen di, ju goi di {away}.	#213
(S)Ex. ju bre senu, ju du di abɛ-, ondu di put.	#214
(S)Ex. ɛn ju kan pɛk di saut fʌm bɛni di pond.	#215
(S)Ex. an a se stif an.	#216
(S)Ex. ɛn ple ju rup sɛsmʌn hil	#217
(S)Ex. wun abobo dɛr fam dɛn {until} nu.	#218
(S)Ex. . . . a rit ši wif ma	#219
(S)Ex. mi a wun fa fʌm sɛnu, fan di skol.	#220
(S)Ex. ju a tɛtɛ di bʌn senu?	#221
(S)Ex. ju ne ju mɛs o ju kʌtlaš ɛn ju kap di.	#222
(S)Ex. fo stʌp, fo stʌp, fo stʌp senu	#223
(S)Ex. kit. ju ka skit en fuluk.	#224
(S)Ex. (S)Ex. am a ha hɛle.	#225
(S)Ex. mi no ki ɛntin; mi noit a ki ɛnten weran.	#226
(S)Ex. wɛnʌ a ko di moruk, am a se: moruk {Ms. Stevens}.	#227
(S)Ex. prat a am, so an a wit ɛn klen bɛči.	#228
(S)Ex. ko lɛk.	#229
(S)Ex. mi no a ha hondu.	#230
(S)Ex. ha plantai mi kasau, bateta, pampun, bonči, {okra}, maŋgo, {pear}. . . .	#231	not used
(S)Ex. ratu?	#232
(S)Ex. ju du stiki brot abɛnɛ di {trap}.	#233
(s)Ex. mi no a wit. mi no a ka kibo.	#234
(s)Ex. abɛnɛ sen guse?	#235
(S)Ex. dʌ kabai ka sadl.	#236
(S)Ex. fo wawa?	#237
(S)Ex. sen bin trau en laŋ tit.	#238
(S)Ex. di kin mi moi: {the child pretty}.	#239
(S)Ex. am mi [real] mui.	#240	not used
(S)Ex. gɛstu mi a wɛs a di doktu	#241
(S)Ex. mi suku mi- mi klɛn biči. . .no muči	#242
(S)Ex. ju lo šini mi gorogoro.	#243
(S)Ex. wɛnʌ mi a lo prat a dI pupa, di kIn ne dʌ {phone}.	#244
(S)Ex. mi maŋke en bɛči- en bʌtl supi. . . .	#245
(S)Ex. an a se a lo ki mi wɛran, {but} mi noit a ki am weran.	#246
(S)Ex. am a fra mi as mi lo dil mi senu	#247
(S)Ex. mi ha fʌ bital fʌ di hus.	#248
(S)Ex. mi kambo.	#249
(S)Ex. ɛke satida	#250
(S)Ex. hoso di hundu a kri fan bini di kubu?	#251
Ex. ju fʌ goi di hundu jet ʌbene di hundi hus.	#253
(S)Ex. [go in the] kobo, [in the] kʌb.	#252
(S)Ex. ju fo ne twe stik	#254
(S)Ex. bɛnɛ di karoči.	#255
(S)Ex. abɛni di garoči	#256
(S)Ex. ki sen lo frʌt.	#257
(S)Ex. mi ha bistɛl mi am.	#258
(S)Ex. ju ha boba ʌbo ju skun	#259
(S)Ex. lo a di andu ši a di hus.	#260
(S)Ex. mi no maŋke enten buba abɛnɛ di palʌ.	#261
(S)Ex. ju maŋke sut batɛta?	#262
(S)Ex. an kan se ši gobet.	#262
(S)Ex. {this} kin a di bɛs kin ši ma ha.	#264
(S)Ex. gi mi klen biči a di batita {stuffing}	#265
(S)Ex. sut patitʌ	#266
(S)Ex. mi ful en klen bɛtʌ.	#267
(S)Ex. mi no wɛl bukra, wɛl i swat.	#268
(S)Ex. mi ka ki en bʌkra lo lo amole da.	#269
(S)Ex. am mi swat, nen a en blaŋku.	#270
(S)Ex. ʌ bʌkra	#271	not used
(S)Ex. an a en ro frau.	#272
(S)Ex. di mɛlʌk abɛnɛ di botl.	#273
(S)Ex. no liste di hundu lo ʌbiti.	#274
(S)Ex. du di lɛ abiti. {put out the light, you see?}	#275
(S)Ex. mi no jɛt fɛriki.	#276
(S)Ex. klen menši mi lo kap ju gat.	#277
(S)Ex. a astu di do.	#278
(S)Ex. mi mi mi las šiši mi alif	#279
(S)Ex. ju se sʌnda, manda, disinda, wunsda, dʌndʌda, frida, satʌda	#280
(S)Ex. undu di bɛrɛ.	#281
(S)Ex. wa ju lo diŋ bo?	#282
(S)Ex. di pʌt bin da mi di lipu. di pʌt mi di lipu, ki di da	#283
(S)Ex. wa mi lo du mi kɛkɛtɛs?	#284
(S)Ex. sen fa piši ʌbo ju.	#285
(S)Ex. {They} mi blɛn.	#286
(S)Ex. mi no wɛl brot mi bʌtu.	#287
(S)Ex.eke dak, am a lo fo ki a di jamʌs lo guri.	#288
(S)Ex.wɛn jamus guri, [they] kuri abo bom.	#289
(S)Ex. am a rup ši buči fo ko hɛlp am fo mata di kui.	#290
(S)Ex. no hɛt watu.	#291
(S)Ex. di no a {dig deep} gʌnu.	#292
(S)Ex. sen a ful di batl. . . .	#293
(S)Ex. mi a sɛt a grʌn fo waita senu.	#294	not used
(S)Ex. [and they] sti mi kizin fo lo suk fo mi.	#295
(S)Ex. so an a pase, mi a hopo, mi a kuri, mi lo a hus; se: mama, mi mi huŋgu.	#296
(S)Ex. a buči en mi ma sisi.	#297
(S)Ex. waso am a nam?	#298
(S)Ex. juŋ {that's the boy}.	#299
(S)Ex. {who} dif mi gut?	#300	not used
(S)Ex. mi a skon di hus.	#301
(S)Ex. mi kiziŋ a wun over a karʌl be.	#302
(S)Ex. mi pupa, mi ma ši nʌm ka dot.	#303	not used
(S)Ex. tu di put	#304
(S)Ex. wak bo mi, en minit, mi lo ko. {Wait on me a minute, I'm coming.}	#305
(S)Ex. wɛne am a dot mi a skreju mi a rup am mama.	#306
(S)Ex. mi a wɛrʌk [too] ha:d.	#307
(S)Ex. di frou a, mata di man	#308
(S)Ex. a fa ju hogo, no- noit a fa mi hogo, a fa ju hogo.	#309
(S)Ex. wʌ ju lo dra fanda?	#310
(S)Ex. di nom	#311
(S)Ex. de man	#312
(S)Ex. [your] nɛn o ju, ju meme	#313
(S)Ex. mi no maŋge enten andu.	#314
(S)Ex. wʌ wit.	#315
(S)Ex. di mʌmai bom	#316
(S)Ex. hewun	#317
(S)Ex. wɛnɛ mi a hopo mi hogo, di a wɛ twalv i.	#318
(S)Ex. andu wek.	#319
(S)Ex. sen a diŋk so, [yeah].	#320
(S)Ex. [wi] prat, [wi] lag.	#321
(S)Ex. lo stiko di.	#322
